# Supplementary material for: Sustainability Planning in Las Vegas
Source: Royal Society of Chemistry journal article supplement (doi:10.1039/c9nr02637a), 2013-01-01
Supplement: c9nr02637a1.pdf [file c9nr02637a1.pdf]

Supporting Information(SI):

**Co, N-codoped porous vanadium nitride nanoplates as superior  
bifunctional electrocatalysts for hydrogen evolution and oxygen  
reduction reactions**

Ning Zhang <sup>a</sup>, Liyun Cao <sup>a</sup>, Liangliang Feng, <sup>\*ab</sup> Jianfeng Huang<sup>a</sup>, Koji Kajiyoshi <sup>b</sup>,

Cuiyan Li <sup>a</sup>, Qianqian Liu <sup>a</sup>, Dan Yang <sup>a</sup> and Juju He <sup>a</sup>

*<sup>a</sup> School of Materials Science & Engineering, Shaanxi Key Laboratory of Green Preparation  
and Functionalization for Inorganic Materials, Shaanxi University of Science & Technology,  
Xi'an Shaanxi 710021, P.R. China.*

*<sup>b</sup> Research Laboratory of Hydrothermal Chemistry, Faculty of Science and Technology, Kochi  
University, Kochi, 780-8520, Japan.*

E-mail: fengll@sust.edu.cn

### **Electrochemically Active Surface Area.**

In order to estimate the effective surface area of the electrodes, cyclic voltammograms of catalysts in 1 M KOH was first obtained when there is no Faraday current. The scan speed was set as 10, 20, 40, 60, 80, 100 and 120 mV/s, respectively. When the difference in current density ( $J$ ) between the anodic and cathodic sweeps ( $J_{\text{anodic}} - J_{\text{cathodic}}$ ) at 0.95 V against the scan rate was plotted, a linear relationship between the two was obtained (Fig. 6D). ECSA can be estimated according to the two following formulas <sup>[S1]</sup>:

$$C_{\text{dl}} = i_c/v \quad (1)$$

Where  $i_c$  represents the charging current,  $v$  represents the scan rate.

$$\text{ECSA} = C_{\text{dl}}/C_s \quad (2)$$

A  $C_s$  value of 0.040 mFcm<sup>-2</sup> was thus adopted according to previous reports <sup>[S2]</sup>.

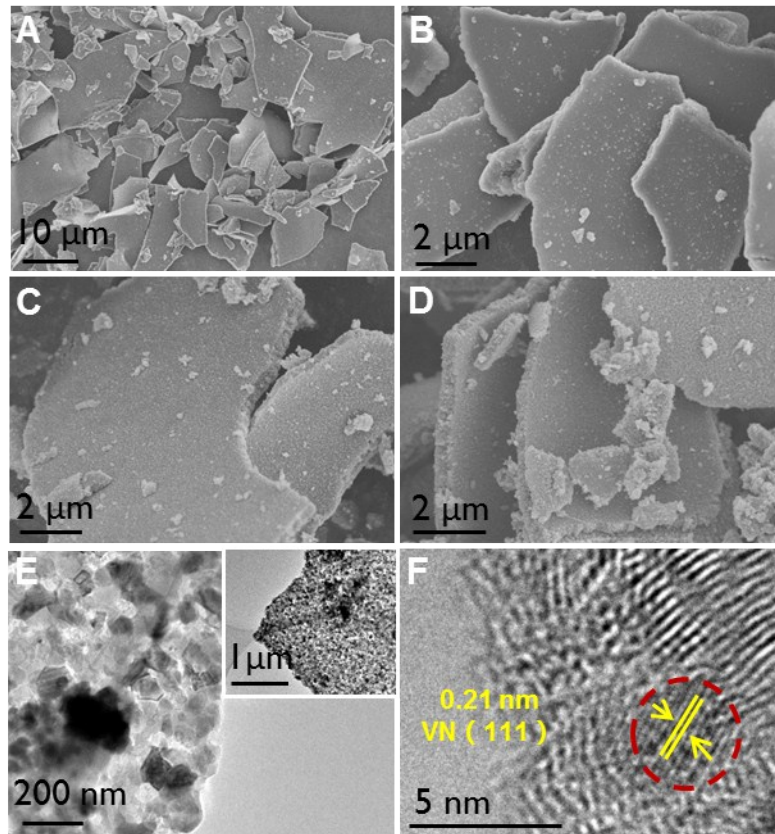

Fig. S1 (A-D) SEM, (E) TEM and (F) HRTEM images of VCoN.

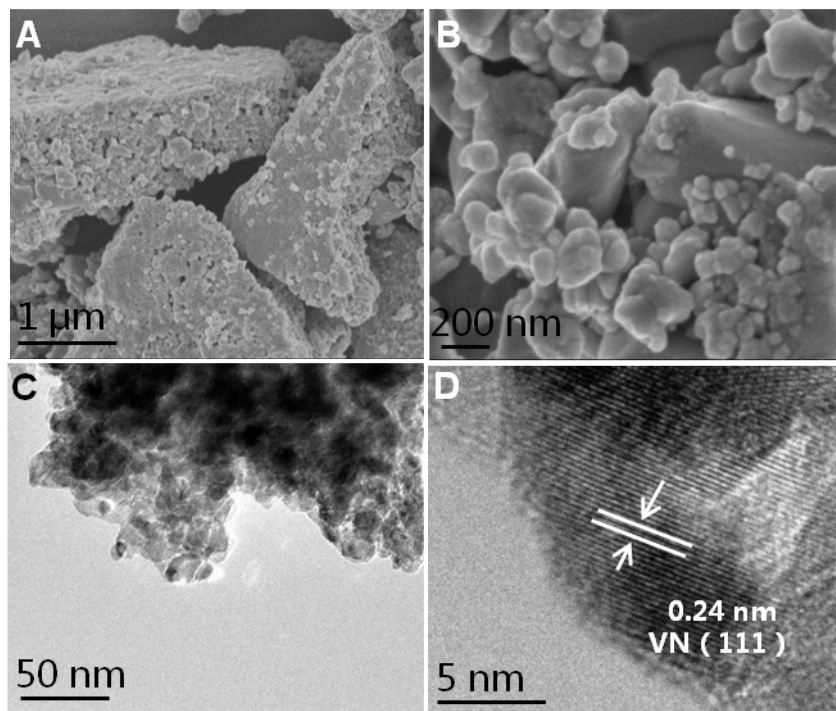

**Fig. S2** (A-B) SEM images, (C-D) TEM and HRTEM images of pure VN.

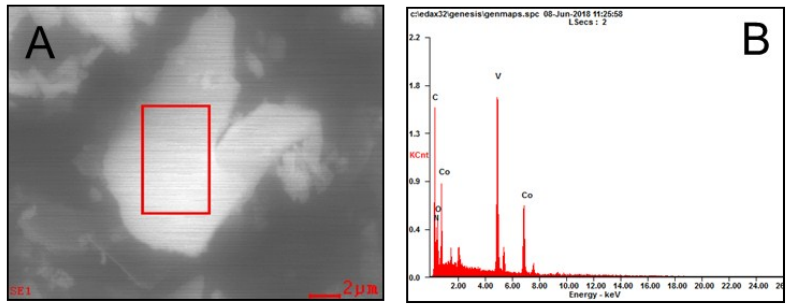

**C**

| <i>Element</i> | <i>Wt%</i> | <i>At%</i> |
|----------------|------------|------------|
| <i>CK</i>      | 25.52      | 43.25      |
| <i>NK</i>      | 14.74      | 21.42      |
| <i>OK</i>      | 14.37      | 18.29      |
| <i>VK</i>      | 25.13      | 10.04      |
| <i>CoK</i>     | 20.24      | 06.99      |
| <i>Matrix</i>  | Correction | ZAF        |

**Fig. S3** EDX results of VCoN (obtained by SEM).

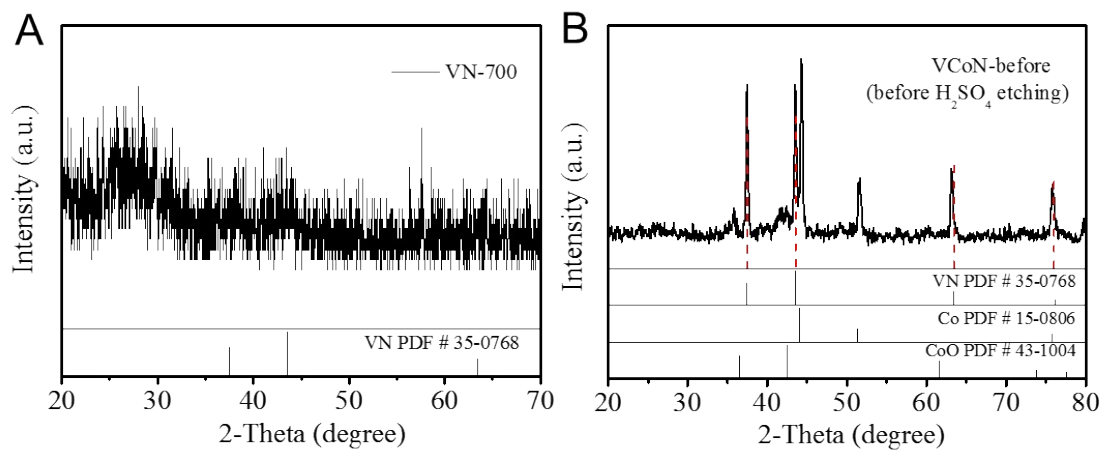

**Fig. S4** XRD patterns of (A) VN-700 and (B) VCoN-before.

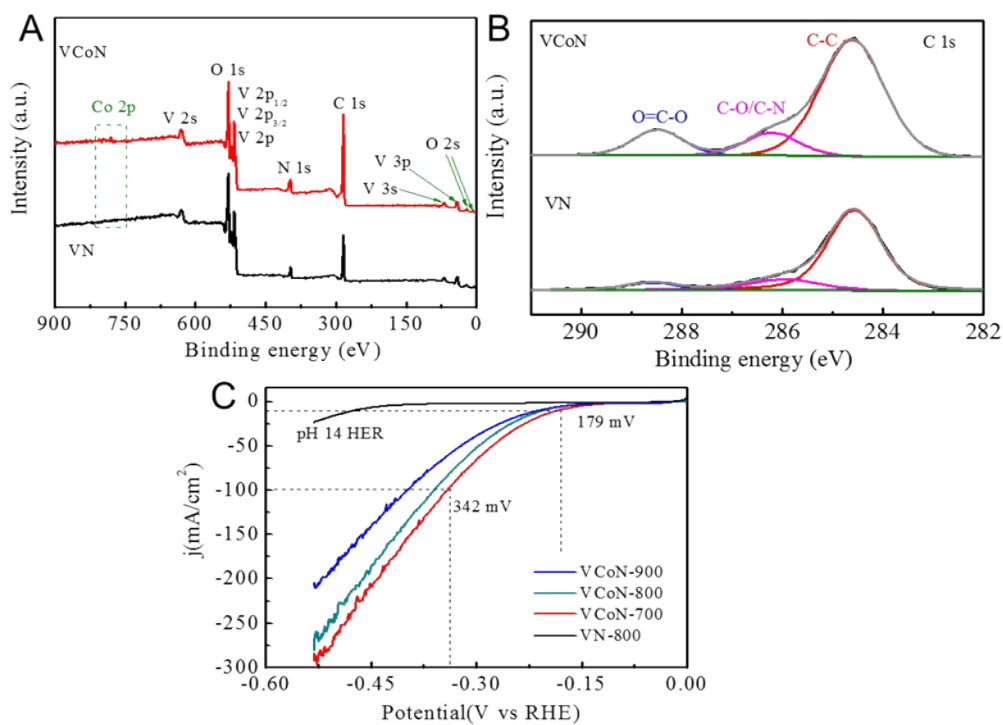

**Fig. S5** (A) Survey, (B) C 1s XPS spectra of VN and VCoN, (C) Polarization curves of samples for HER.

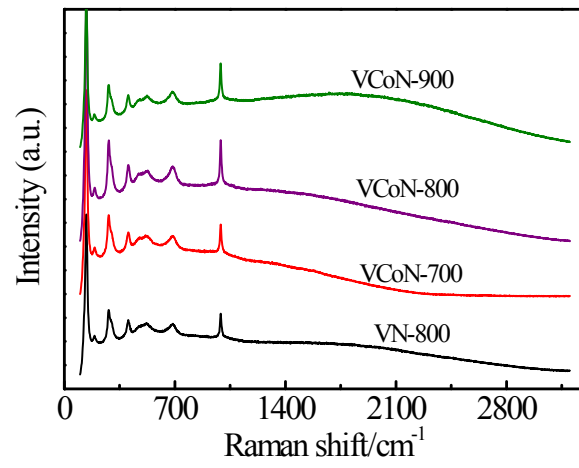

**Fig. S6** Raman spectra of samples.



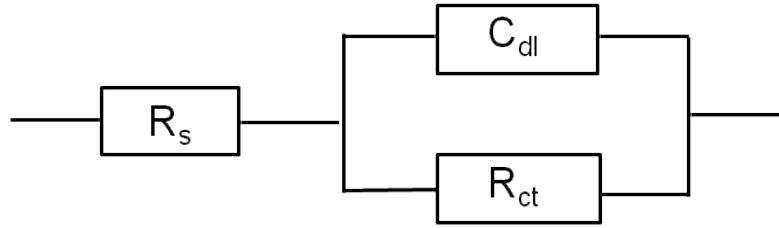

**Fig. S7** Electrical equivalent circuit used to simulate the Nyquist plots in Fig. 6C, where  $R_s$  is the electrolyte resistance,  $R_{ct}$  is the charge-transfer resistance, and  $C_{dl}$  represents the double-layer capacitance.

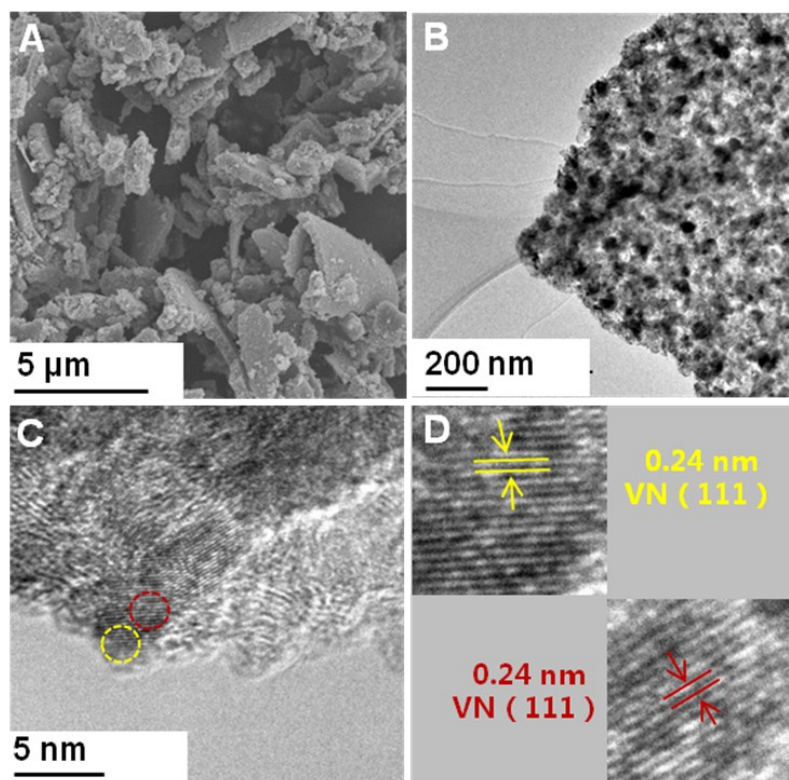

**Fig. S8** (A): SEM, (B-C) TEM and (D): HRTEM images of VCoN-700 after the HER stability test of i-t curve for 100 h at pH 14.

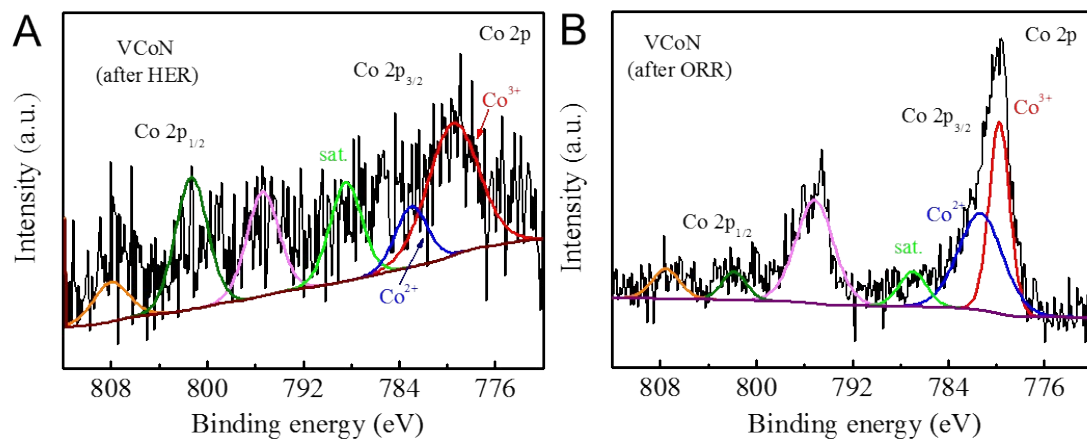

**Fig. S9** Co 2p high-resolution XPS spectra of VCoN after (A) HER and (B) ORR stability test.

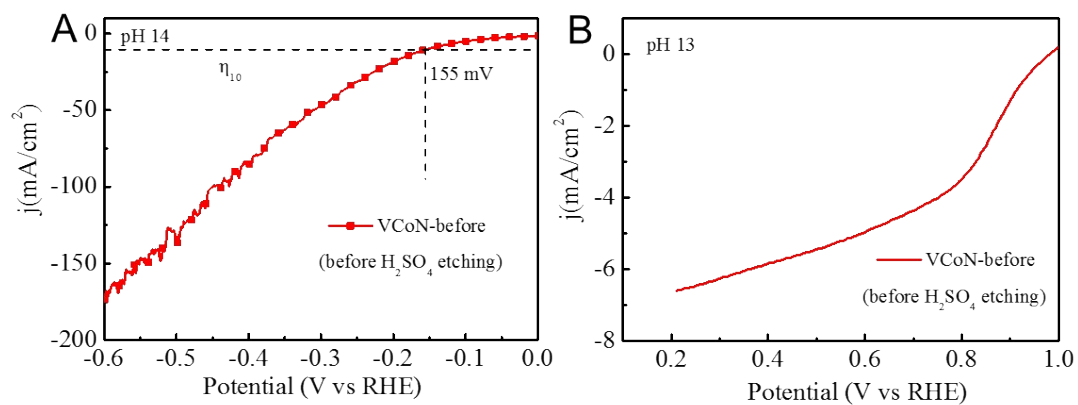

**Fig. S10** (A) Polarization curve for HER, (B) LSV curve at a sweep rate of 5 mV s<sup>-1</sup> and a rotation speed of 1600 rpm for ORR of VCoN-before.

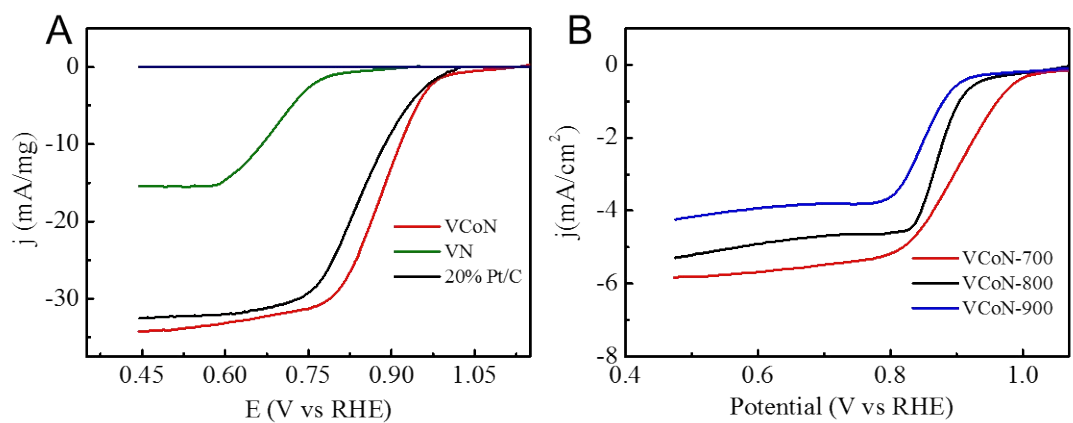

**Fig. S11** (A) RRDE curves of VCoN, 20% Pt/C and VN, (B) LSV curves of VCoN samples obtained at different synthesis temperatures at a sweep rate of  $5 \text{ mV s}^{-1}$  and a rotation speed of 1600 rpm for ORR.

**Table S1** Comparisons of VN-based electrocatalysts for ORR, as well as bifunctional electrocatalysts for both HER and ORR.

| Catalyst                                     | Overpotential (mV, at 10 mA cm <sup>-2</sup> ) | Stability test (HER) | Potential (V, at half peak) | Stability test (ORR) | Reference                                                     |
|----------------------------------------------|------------------------------------------------|----------------------|-----------------------------|----------------------|---------------------------------------------------------------|
| VCoN                                         | 179                                            | 100 h                | 0.91                        | 2000 cycles          | <b>This work</b>                                              |
| 20% Pt/C                                     | 43                                             | -                    | 0.87                        | 2000 cycles          |                                                               |
| V <sub>0.95</sub> Co <sub>0.05</sub> N MFs   | -                                              | -                    | 0.8                         | 25000 s              | <i>Appl. Mater. Interfaces.</i> 2018, <b>10</b> , 11604-11612 |
| NGT-Co <sub>35</sub> V <sub>65</sub> -45-900 | -                                              | -                    | 0.81                        | 10000 cycles         | <i>Nanoscale.</i> 2018, <b>10</b> , 4311-4319                 |
| Mo <sub>2</sub> C@NC nanomesh                | 36                                             | 16 h                 | 0.872                       | 10 h                 | <i>Adv. Funct. Mater.</i> 2018, <b>18</b> , 1705967           |
| Mo <sub>2</sub> C/NPC NFs                    | 134                                            | 10 h                 | 0.77                        | 10 h                 | <i>Carbon.</i> 2017, <b>114</b> , 628-634                     |
| Co, N-CT                                     | 106                                            | 20 h                 | 0.85                        | 20 h                 | <i>J. Mater. Chem. A.</i> 2018, <b>35</b> , 17067-17074       |
| Fe-CACNF                                     | 350                                            | ~13 h                | 0.83                        | ~30 h                | <i>J. Mater. Chem. A.</i> 2017, <b>5</b> , 7507-7515          |
| A-PBCCF-H                                    | 225                                            | 12 h                 | 0.76                        | 12 h                 | <i>Nano Energy.</i> 2017, <b>32</b> , 247-254                 |
| BCN                                          | 216                                            | 8 h                  | 0.82                        | ~8 h                 | <i>J. Mater. Chem. A.</i> 2016, <b>42</b> , 16469-16475       |

## References

[S1] CCL. McCrory, S. Jung, Peters Jonas C. and Jaramillo Thomas F., *J. Am. Chem.*

*Soc.*, 2013, **135**, 16977.

[S2] Y. Zhang, Q. Shao, Y. C. Pi, J. Guo, X. Q. Huang, *Small*, 2017, **13**, 1700355.
